# Supplementary material for: Factors Influencing Marker Expressions of Cultured Human Cord Blood-Derived Mast Cells
Source: MDPI journal article supplement (doi:10.3390/ijms241914891), 2023-10-04
Supplement: s1 [file s1]

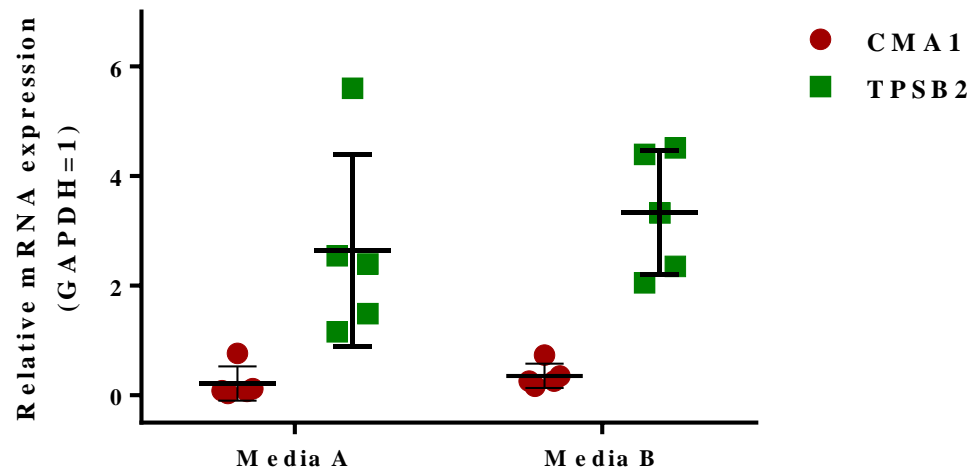

**Supplementary Figure S1.** hCBMCs marker expression varies when cultured in two different media. RT-qPCR analyzed data is representative of triplicated experiments of five donors. Data shown are the means  $\pm$  SD. Media A, StemSpan<sup>TM</sup>-XF; Media B, Stem Line II.
